# Supplementary material for: Vancomycin dimer formation between analogues of bacterial peptidoglycan surfaces probed by force spectroscopy
Source: Royal Society of Chemistry journal article supplement (doi:10.1039/b919347b), 2010-01-01

## **ELECTRONIC SUPPLEMENTARY INFORMATION**

### **Vancomycin dimer formation between analogues of bacterial peptidoglycan surfaces probed by force spectroscopy**

*Matthew Batchelor,<sup>a</sup> Dejian Zhou,<sup>b</sup> Matthew A. Cooper,<sup>c</sup> Chris Abell<sup>a</sup> and Trevor Rayment<sup>d</sup>*

<sup>a</sup> Department of Chemistry, University of Cambridge, Lensfield Road, Cambridge, CB2 1EW,  
UK.

<sup>b</sup> School of Chemistry and Astbury Centre for Structural Molecular Biology, University of  
Leeds, Leeds, LS2 9JT, UK.

<sup>c</sup> Institute for Molecular Bioscience, The University of Queensland, Brisbane, 4072, Australia.

<sup>d</sup> School of Chemistry, University of Birmingham, Birmingham, B15 2TT, UK.

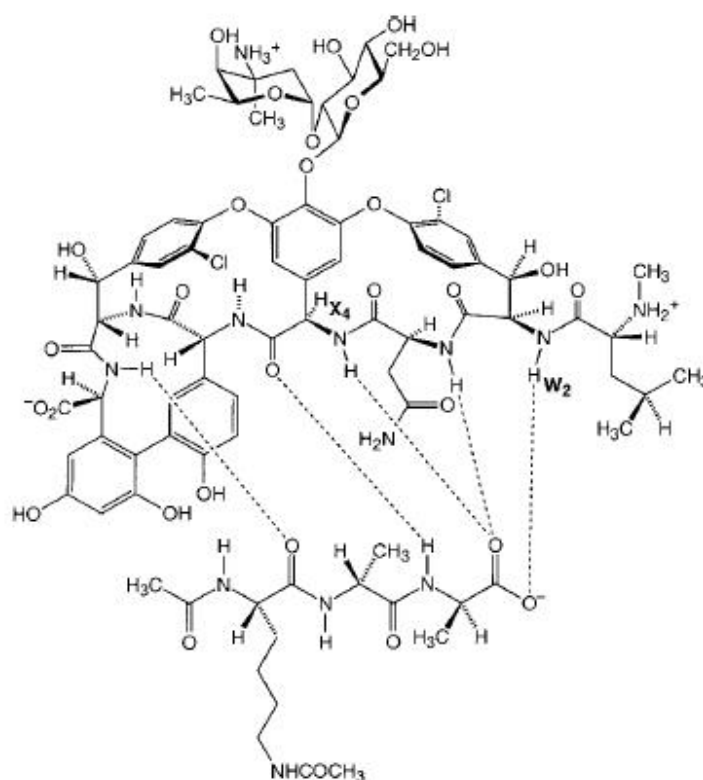

**Fig. S1** Illustration of the specific interactions between vancomycin and Ac<sub>2</sub>-L-Lysyl-D-Alanyl-D-Alanine (Ac<sub>2</sub>-KDADA). The broken lines indicate specific hydrogen bonds. Mutation of the terminal D-Alanine to D-Lactate (as in the case of KDADLac) removes a hydrogen bond (second from the left) which results in the significantly weaker binding ( $K_d$  increased by  $\sim 3$  orders of magnitude) associated with bacterial resistance to vancomycin. D. H. Williams and B. Bardsley: The vancomycin group of antibiotics and the fight against resistant bacteria, *Angew. Chem., Int. Ed.*, 1999, **38**, 1173–1193. Copyright Wiley-VCH Verlag GmbH & Co. KGaA. Reproduced with permission.

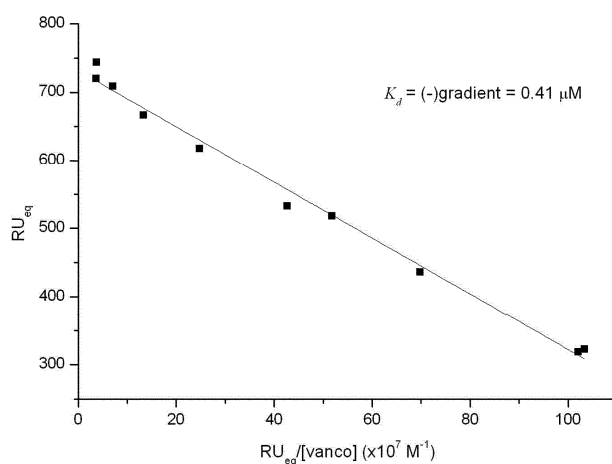

**Fig. S2** An example of a Scatchard plot drawn to directly calculate  $K_d$  from equilibrium measurements at different analyte concentrations.

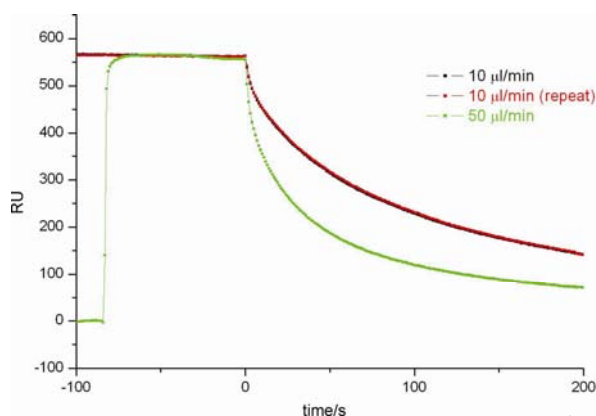

**Fig. S3** The effect of increasing the flow rate from 10 to 50  $\mu\text{l min}^{-1}$  on the dissociation rate of vancomycin from a 1 : 9 1 : 4 surface.

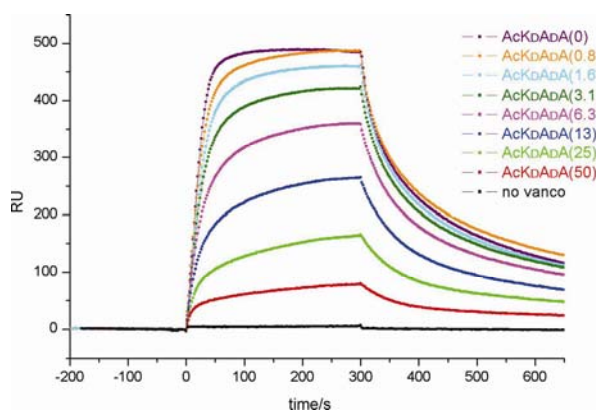

**Fig. S4** The effect of introducing AcKDADA (concentrations in  $\mu\text{M}$  in brackets) on the binding profile of a  $1 \mu\text{M}$  solution of vancomycin to a  $1 : 9 \quad 1 : 4$  surface.

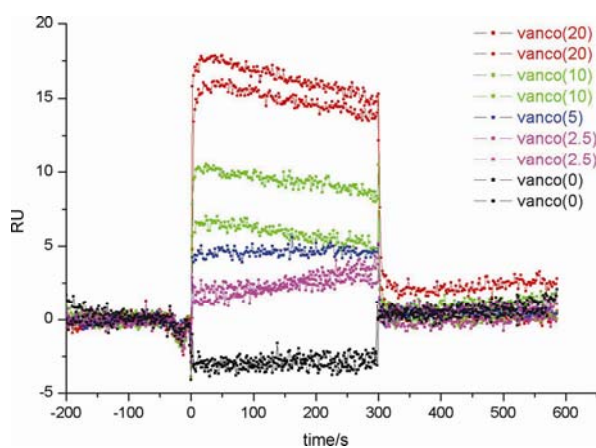

**Fig. S5** Overlaid sensorgrams showing typical SPR responses to vancomycin solutions (concentrations in  $\mu\text{M}$  in brackets) for a  $1 : 9 \quad 2 : 4$  (KDALA) surface.

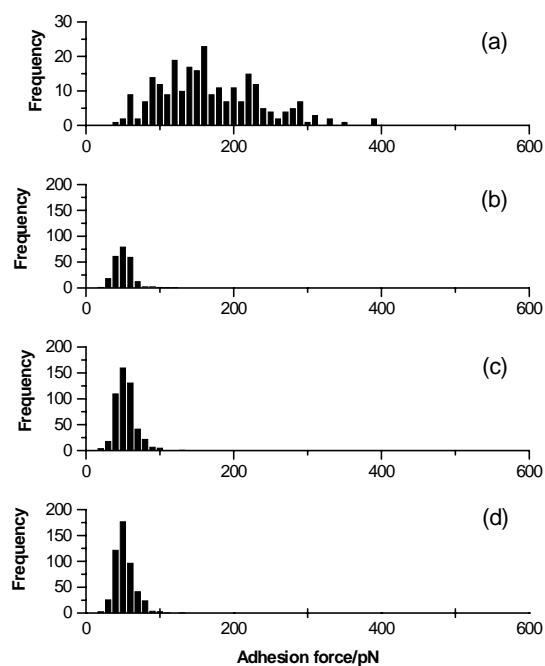

**Fig. S6** Histograms of adhesion forces collected using the same KDADA-modified probe in a PBS solution containing 1  $\mu$ M vancomycin on a: (a) KDADA surface ( $n=249$ ), (b) KDALA surface ( $n=248$ ), (c) KDAdLac surface ( $n=500$ ), and (d) PEG-OH surface ( $n=500$ ).

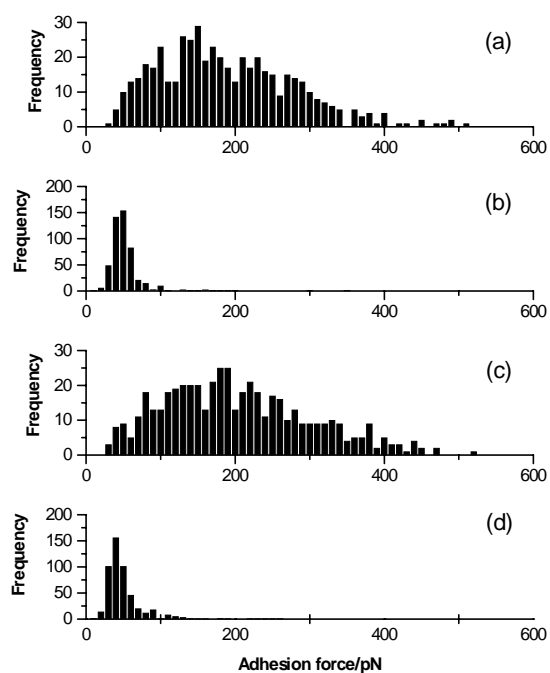

**Fig. S7** Histograms of adhesion forces collected using the same KDADA probe-surface combination in PBS solutions containing: (a) 1  $\mu$ M vancomycin ( $n=500$ ), (b) 1  $\mu$ M vancomycin and 50  $\mu$ M AcKDADA ( $n=500$ ), (c) 1  $\mu$ M vancomycin ( $n=500$ ), and (d) 50  $\mu$ M AcKDADA ( $n=500$ ).

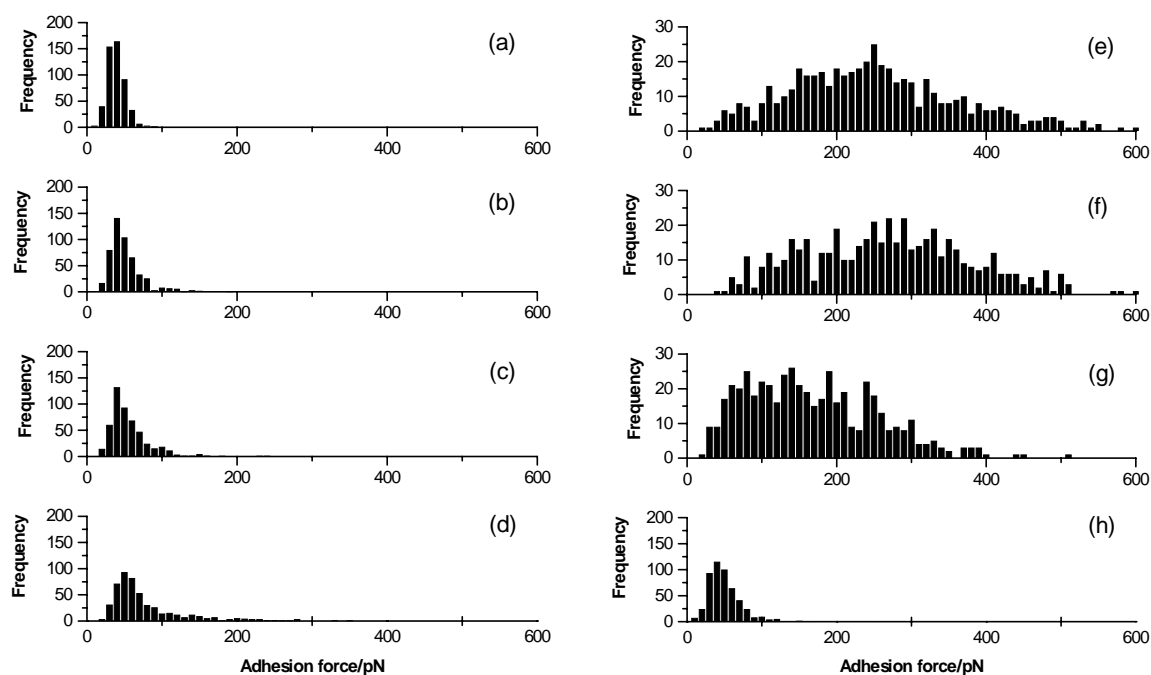

**Fig. S8** Histograms of adhesion forces collected using the same KDADA probe-surface combination in PBS solutions containing: (a) 0 nM vancomycin ( $n=500$ ), (b) 1 nM vancomycin ( $n=500$ ), (c) 10 nM vancomycin ( $n=498$ ), (d) 100 nM vancomycin ( $n=500$ ), (e) 1  $\mu$ M vancomycin ( $n=500$ ), (f) 10  $\mu$ M vancomycin ( $n=500$ ), (g) 100  $\mu$ M vancomycin ( $n=499$ ), and (h) 0 nM vancomycin, after rinsing with buffer ( $n=499$ ).

## Synthesis of compound 5

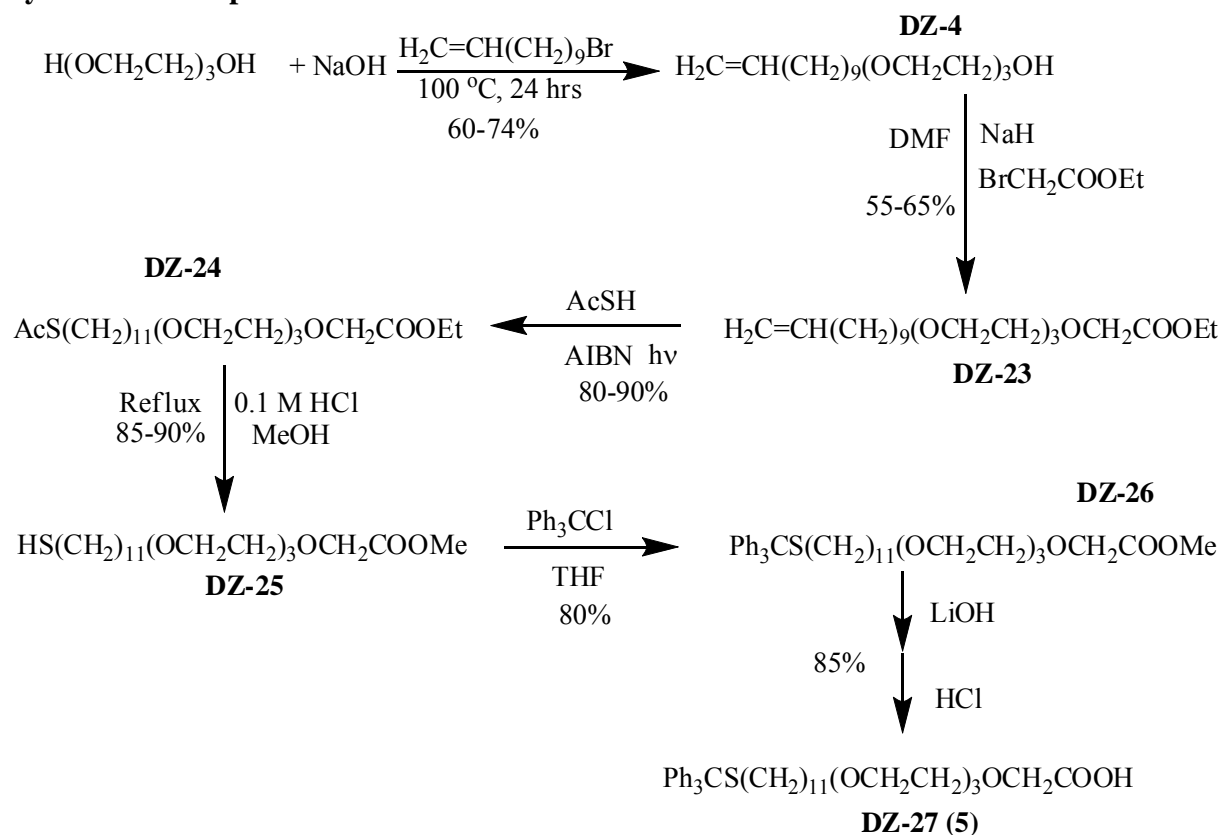

## Scheme S1 Synthesis of compound 5

**DZ-4.** A mixture of 13 M NaOH (1.7 mL, 21.5 mmol) and tri(ethylene glycol) (16.11 g, 105 mmol) was stirred in an oil bath at  $100^\circ\text{C}$  under an atmosphere of argon for 30 minutes. 11-Bromoundec-1-ene (5 g, 21.5 mmol) was then added. After 24 hours, the reaction mixture was cooled and extracted with hexane. Concentration of the combined hexane extracts by rotary evaporation at reduced pressure gave a yellow oil containing a mixture of mono and diether, according to analysis by  $^1\text{H}$  NMR spectroscopy. Purification by column chromatography on silica gel (EtOAc) gave (4.4 g, 68%) of ether **DZ-4**,  $R_f(\text{EtOAc})$  0.51.

IR  $\nu_{\text{max}}$  (film)/ $\text{cm}^{-1}$  3464(O-H), 3074(C-H), 1639(C=C), 1121(C-O);  $^1\text{H}$  NMR  $\delta$  ppm (400 MHz,  $\text{CDCl}_3$ ) 1.16-1.33 (m, 12H,  $6\text{CH}_2$ ), 1.50 (p,  $J = 7.0\text{ Hz}$ , 2H,  $\text{CH}_2$ ), 1.95 (q,  $J = 7.0\text{ Hz}$ , 2H,  $\text{CH}_2$ -), 2.94 (s, br, 1H, -OH), 3.37 (t,  $J = 7.0\text{ Hz}$ , 2H,  $-\text{CH}_2\text{-PEG}$ ), 3.47-3.67 (m, 12H, 3PEG), 4.81-4.93 (m, 2H,  $\text{CH}_2=\text{CH-}$ ), 5.65-5.77 (m, 1H,  $\text{CH}_2=\text{CH-}$ ).  $^{13}\text{C}$  NMR (100 MHz,  $\text{CDCl}_3$ )  $\delta$  ppm 139.46 (-



CH=CH<sub>2</sub>), 114.44 (-CH=CH<sub>2</sub>), 72.92, 71.86, 70.95, 70.92, 70.69, 70.35 (6 PEG C), 61.97 (-CH<sub>2</sub>-PEG), 34.11, 29.91, 29.85, 29.77, 29.75, 29.43, 29.24, 26.39.

**DZ-23.** Sodium hydride (520 mg, 13 mmol, 60% suspension in mineral oil) was added to a solution of undec-1-en-11-yltri(ethylene glycol) **DZ-4** (2.6 g, 8.6 mmol) in dry DMF (3 mL) at 0 °C. The resulting mixture was stirred at 0 °C for 10 minutes, then ethyl-bromoacetate (1.92 mL, 13 mmol) was added under a nitrogen atmosphere. The reaction mixture was stirred at room temperature for 3 hours. An additional amount of ethyl-bromoacetate (1.92 mL, 13 mmol) was added and the reaction heated at 40 °C overnight. On cooling, the reaction mixture was extracted into EtOAc (3 × 20 mL), washed with distilled water (2 × 20 mL) and with brine (20 mL), dried over anhydrous Na<sub>2</sub>SO<sub>4</sub> and evaporated to dryness. Purification by column chromatography on silica gel (hexane/EtOAc 1:1) gave the ester **DZ-23** (4.5 g, impure, maybe including ethyl-bromoacetate and mineral oil), R<sub>f</sub> (silica gel, hexane/EtOAc 1:1) 0.34.

<sup>1</sup>H NMR (400 MHz, CDCl<sub>3</sub>) δ ppm 1.20-1.37 (m, 15H, (CH<sub>2</sub>)<sub>6</sub> + CH<sub>3</sub>), 1.48-1.58 (m, 2H, CH<sub>2</sub>), 1.95-2.03 (m, 2H, CH<sub>2</sub>), 3.40 (t, J = 6.9 Hz, 2H, -CH<sub>2</sub>PEG), 3.51-3.71 (m, 12H, 3PEG), 4.10 (s, 2H, -CH<sub>2</sub>COOEt), 4.17 (q, J = 7.1 Hz, 2H, -COOCH<sub>2</sub>), 4.85-4.96 (m, 2H, H<sub>2</sub>C=), 5.70-5.82 (m, 1H, =CH-); <sup>13</sup>C NMR (100 MHz, CDCl<sub>3</sub>) δ ppm 170.81 (C=O), 139.55 (-CH=), 114.46 (H<sub>2</sub>C=), 71.88, 71.26, 71.00, 70.95, 70.42, 69.09 (PEG, C), 61.12 (-O-PEG), 34.15, 29.99, 29.88, 29.81, 29.78, 29.42, 29.28, 26.44, 14.57 (CH<sub>3</sub>). **LCMS** (ES<sup>+</sup>): 389 (40%, [M+H]<sup>+</sup>), 407 (100%, [M+NH<sub>4</sub>]<sup>+</sup>).

**DZ-24.** To 8 Pyrex tubes, each containing undec-1-en-11-yltri(ethylene glycol)-ethyl ester **DZ-23** (0.39 g, 1 mmol) in MeOH (5 mL) was added AIBN (30 mg), and thioacetic acid (0.12 mL, 2.4 mmol). Each tube was bubbled with N<sub>2</sub> for 2 minutes. The tubes were then sealed, put into a photochemical reactor and irradiated with a mercury lamp at 340 nm for 24 hours. On cooling, the tubes were taken out from the reactor. The reaction mixtures were then combined and evaporated to dryness. The solvent was then removed under reduced pressure and the residue

purified by chromatography on a silica gel column (hexane/EtOAc 2:1) to obtain the ester **DZ-24** as a slightly yellowish oil (3.36 g, 90%).

$^1\text{H}$  NMR (400 MHz,  $\text{CDCl}_3$ )  $\delta$  ppm 1.18-1.32 (m, 17H,  $(\text{CH}_2)_7+\text{CH}_3$ ), 1.46-1.56 (m, 2H,  $\text{CH}_2$ ), 2.27 (s, 3H,  $\text{CH}_3(\text{C}=\text{O})\text{S}$ ), 2.81 (t, 2H,  $J = 7.2$  Hz,  $\text{AcSCH}_2-$ ), 3.40 (t,  $J = 7.0$  Hz, 2H,  $-\text{CH}_2\text{PEG}$ ), 3.50-3.70 (m, 12H, 3PEG), 4.10 (s, 2H,  $-\text{CH}_2\text{COOEt}$ ), 4.17 (q,  $J = 7.1$  Hz, 2H,  $-\text{COOCH}_2$ );  $^{13}\text{C}$  NMR (100 MHz,  $\text{CDCl}_3$ )  $\delta$  ppm 201.30 ( $\text{CH}_3(\text{C}=\text{O})\text{S}-$ ), 175.72 ( $\text{C}=\text{O}$ ), 76.78, 76.13, 75.87, 75.29, 73.97, 73.12 (PEG, C), 66.03, 35.90, 29.99, 29.88, 29.81, 29.78, 29.42, 29.28, 26.44, 14.57 ( $\text{CH}_3$ ). **LCMS** ( $\text{ES}^+$ ), 465 (40%,  $[\text{M}+\text{H}]^+$ ), 482 (100%,  $[\text{M}+\text{NH}_4]^+$ ).

**DZ-25.** To 1-thioacetateundec--11-yltri(ethylene glycol)-ethyl ester **DZ-24** (3.36 g, 7.2 mmol) in MeOH (10 mL) was added 0.1 M HCl (8 mL). The reaction mixture was heated at reflux under  $\text{N}_2$  for 8 hours. The solvent was then evaporated and the residue purified by column chromatography on silica gel (hexane/EtOAc 1:1) obtained the acid **DZ-25** as a slightly yellowish oil (2.70 g, 92%).

$^1\text{H}$  NMR (400 MHz,  $\text{CDCl}_3$ )  $\delta$  ppm 1.20-1.40 (m, 14H,  $7\text{CH}_2$ ), 1.50-1.61 (m, 4H,  $2\text{CH}_2$ ), 2.49 (q, 2H,  $J = 7.2$  Hz,  $-\text{CH}_2\text{SH}$ ), 3.41 (t, 2H,  $J = 6.9$  Hz,  $-\text{CH}_2\text{PEG}$ ), 3.51-3.75 (m, 15H,  $3\text{PEG} + \text{CH}_3$ ), 4.15 (s, 2H,  $-\text{CH}_2\text{COOMe}$ );  $^{13}\text{C}$  NMR (100 MHz,  $\text{CDCl}_3$ )  $\delta$  ppm 170.68 ( $\text{C}=\text{O}$ ), 71.31, 70.69, 70.40, 70.34, 69.81, 68.40 (PEG, C), 51.57 ( $\text{CH}_3$ ), 33.82, 29.39, 29.32, 29.27, 28.83, 28.14, 25.85, 24.43. **LCMS** ( $\text{ES}^+$ ): 409 (45%,  $[\text{M}+\text{H}]^+$ ), 426 (100%,  $[\text{M}+\text{NH}_4]^+$ ).

**DZ-26.** 2-[11-Tritylthiolundec-1-yltri(ethylene glycol)] acetic acid **4.7** was synthesized according to the literature procedure (see Houseman, B. T.; Mrksich, M. *J. Org. Chem.* **1998**, 63, 7552-7555.), and purified by column chromatography on silica gel (hexane/EtOAc 1:1) ( $R_f = 0.23$  (1:1 EtOAc/hexane)) as a slightly yellow oil.

$^1\text{H}$  NMR (400 MHz,  $\text{CDCl}_3$ )  $\delta$  ppm 1.09-1.41 (m, 16H,  $8\text{CH}_2$ ), 1.51-1.60 (m, 2H,  $\text{CH}_2$ ), 2.11 (t, 2H,  $J = 7.2$  Hz,  $\text{Ph}_3\text{CSCH}_2$ ), 3.42 (t, 2H,  $J = 6.9$  Hz,  $-\text{CH}_2\text{PEG}$ ), 3.54-3.75 (m, 15H,  $3\text{PEG} + \text{CH}_3$ ), 4.15 (s, 2H,  $-\text{CH}_2\text{COOMe}$ ), 7.15-7.21 (m, 3H,  $3\text{Ph-H para}$ ), 7.22-7.30 (m, 6H,  $6\text{ Ph-H}$ ),

7.37-7.42 (m, 6H, 6Ph-**H**);  $^{13}\text{C}$  NMR (100 MHz,  $\text{CDCl}_3$ )  $\delta$  ppm 171.53 (C=O), 145.70, 130.22, 128.42, 127.11 (Ph-C), 72.17, 71.55, 71.26, 71.20, 70.67, 69.26 (PEG-C), 52.42 ( $\text{CH}_3$ ), 32.64, 30.26, 30.18, 30.11, 30.03, 29.81, 29.64, 29.21, 26.71. **LCMS** ( $\text{ES}^+$ ): 668 (80%,  $[\text{M}+\text{NH}_4]^+$ ).

**DZ-27 (5).** The synthesis of DZ-27 (**5**) was prepared following a literature procedure and purified by followed by purified by column chromatography on silica gel (10% MeOH/ $\text{CH}_2\text{Cl}_2$ ,  $R_f$  = 0.27) as a slightly yell oil.

$^1\text{H}$  NMR (400 MHz,  $\text{CDCl}_3$ )  $\delta$  ppm 1.08-1.30 (m, 14H, 7 $\text{CH}_2$ ), 1.31-1.41 (m, 2H,  $\text{CH}_2$ ), 1.50-1.60 (m, 2H,  $\text{CH}_2$ ), 2.11 (s, 2H,  $J$  = 7.1 Hz,  $-\text{CH}_2\text{SCPh}_3$ ), 3.42 (t,  $J$  = 7.0 Hz, 2H,  $-\text{CH}_2\text{PEG}$ ), 3.54-3.72 (m, 12H, 3 $\text{PEG}$ ), 4.13 (s, 2H,  $-\text{CH}_2\text{COOH}$ ), 7.15-7.22 (m, 3H, 3Ph-**H**), 7.22-7.30 (m, 6H, 6Ph-**H**), 7.36-7.42 (m, 6H, 6Ph-**H**).  $^{13}\text{C}$  NMR (100 MHz,  $\text{CDCl}_3$ )  $\delta$  ppm 173.06 (C=O), 145.61, 128.97, 127.16, 125.86, (Ph-C), 70.98, 69.73, 69.55, 69.51, 69.36, 69.12 (PEG, C), 31.39, 28.94, 28.88, 28.81, 28.57, 28.40, 27.96, 25.39. **HRMS**, (TOF MS), found 659.3391, required for  $\text{C}_{38}\text{H}_{52}\text{O}_6\text{SNa}$   $[\text{M}+\text{Na}]^+$ , 659.3382, dev., 1.27 ppm.  $R_f$  (10% MeOH/ $\text{CH}_2\text{Cl}_2$ ), 0.27.

## Synthesis of peptide-thiols

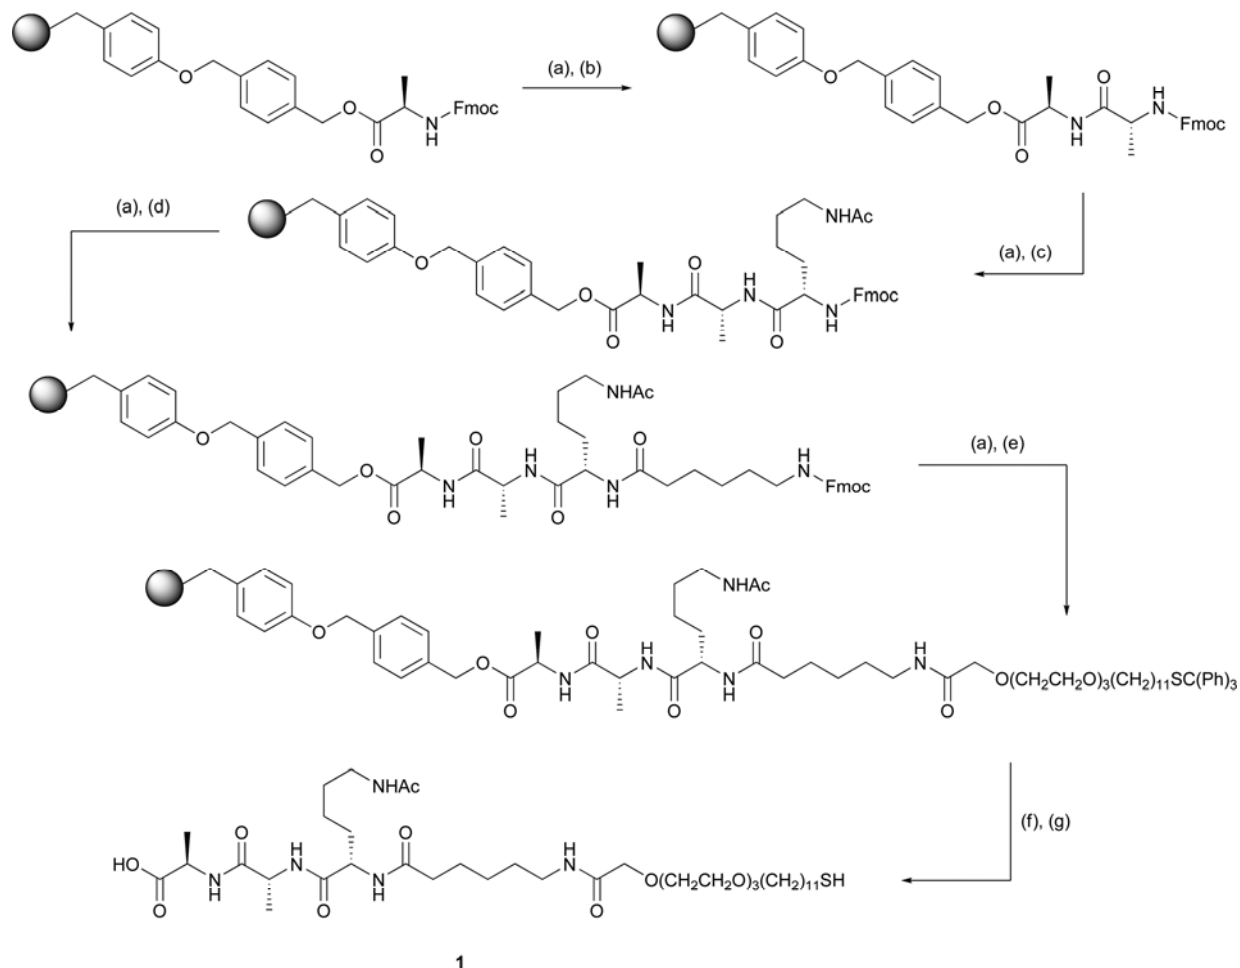

**Scheme S2** Synthesis of the K<sub>D</sub>ADA-modified thiol (**1**). Conditions: (a) piperidine, DMF; (b) Fmoc-DAla-OH, EDC, HOBT, DMF; (c) Fmoc-Llys-OH, EDC, HOBT, DMF; (d) Fmoc-Ahx-OH, EDC, HOBT, DMF; (e) **5**, EDC, HOBT, DMF; (f) TFA, DCM, Et<sub>3</sub>SiH; (g) TFA, CHCl<sub>3</sub>, BuSH.

## NMR and HR-MS Spectra of the peptide-thiols

### High resolution mass spectroscopy **KdAdA**

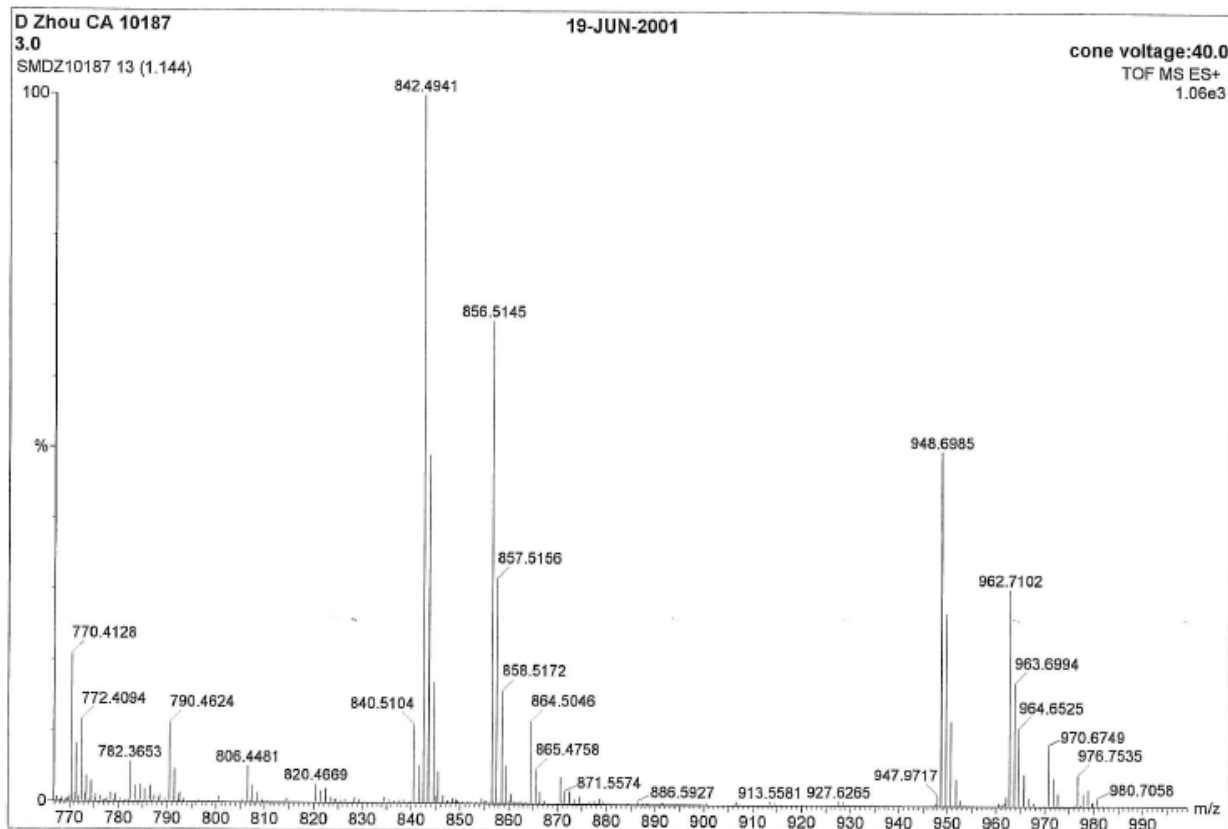



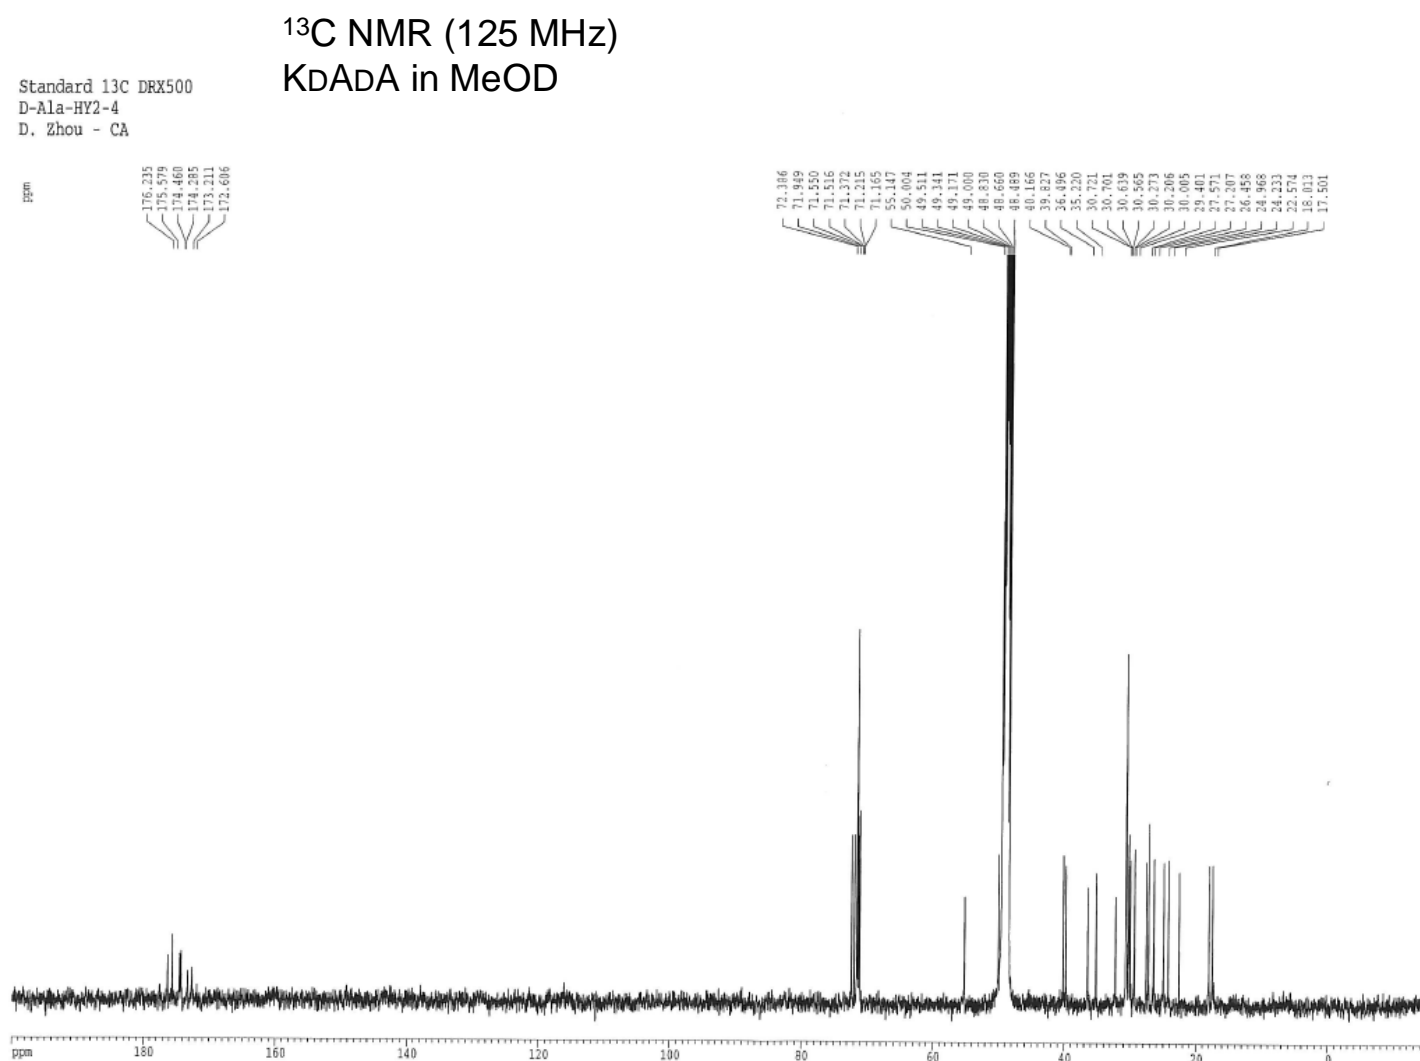

Standard APT DRX500  
D-Ala-HY2-4  
D. Zhou - CA

$^{13}\text{C}$  NMR (APT)  
KdADA in MeOD

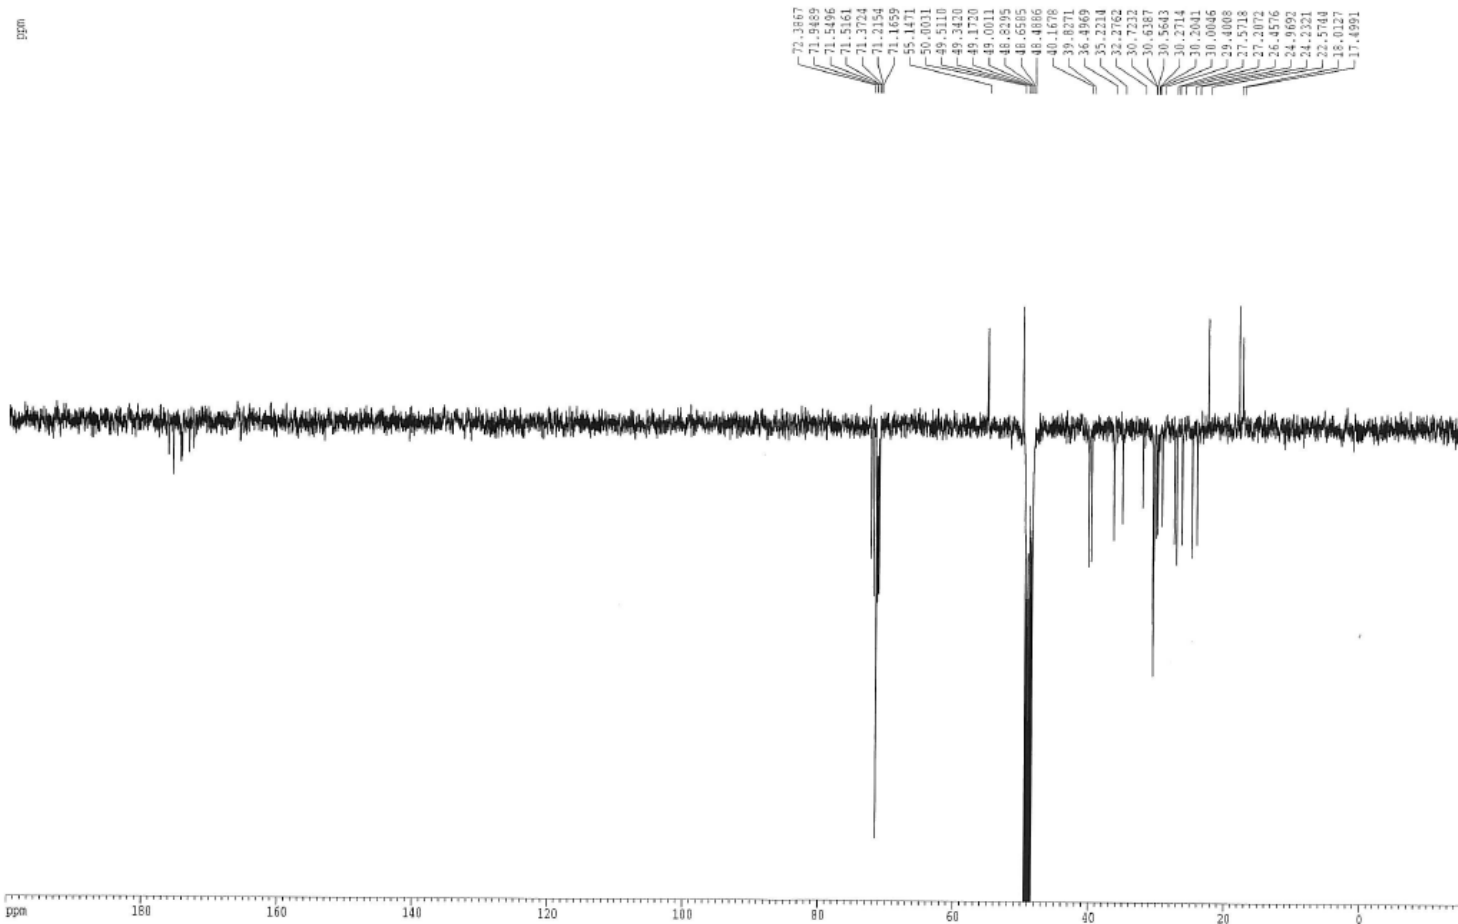



## High resolution mass spectroscopy KdAdLac

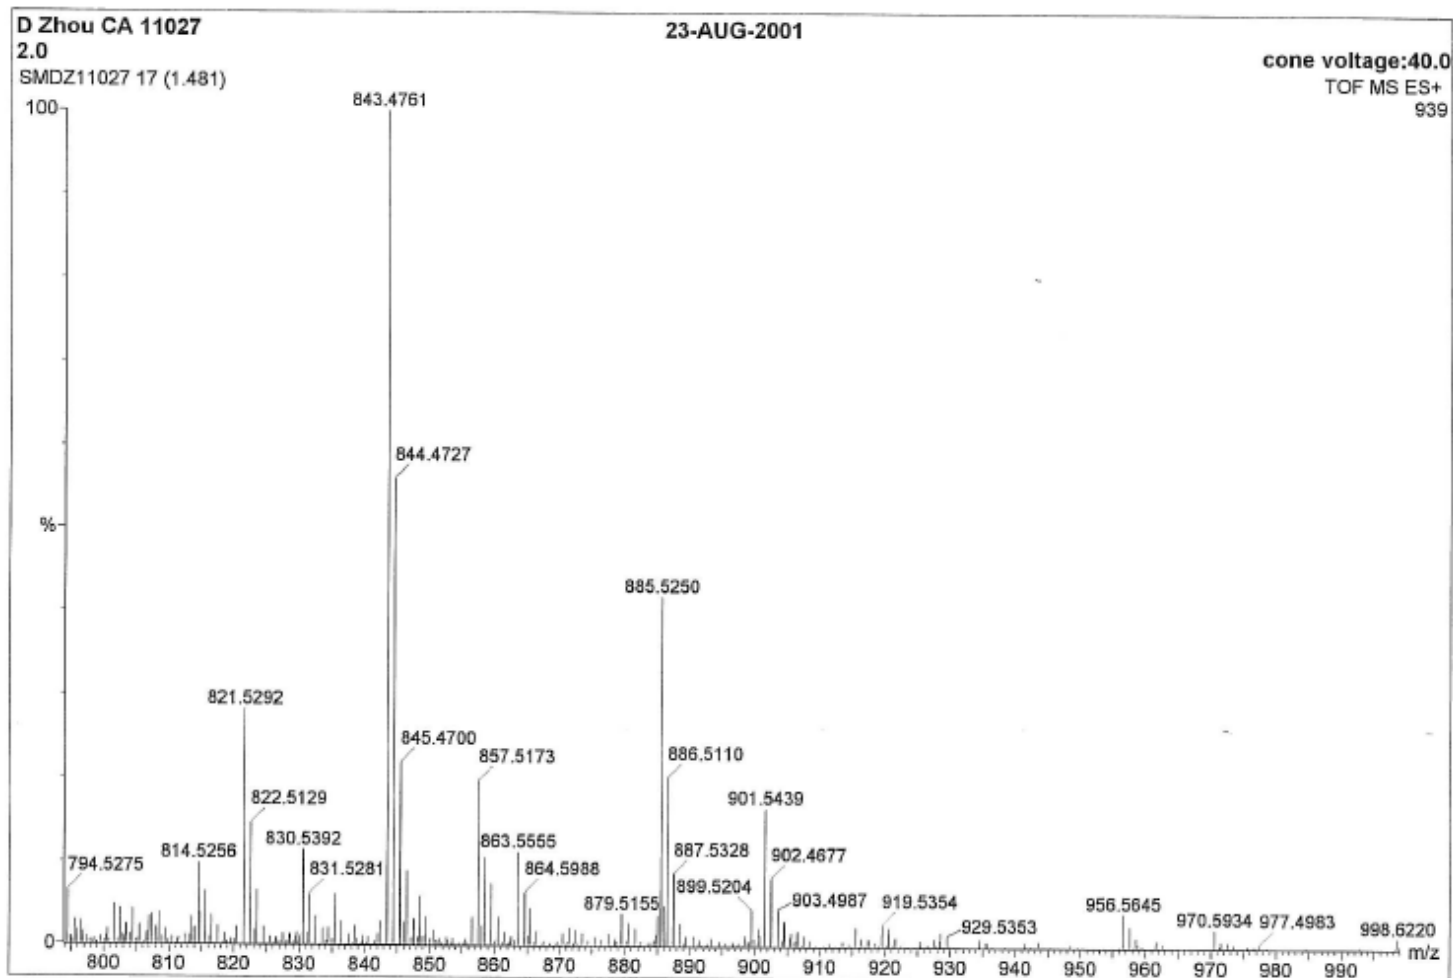

# **<sup>1</sup>H-NMR (500 MHz) KdAdLac in MeOD**

Standard <sup>1</sup>H DRX500  
Lac-RE1-4  
D. Zhou - CA

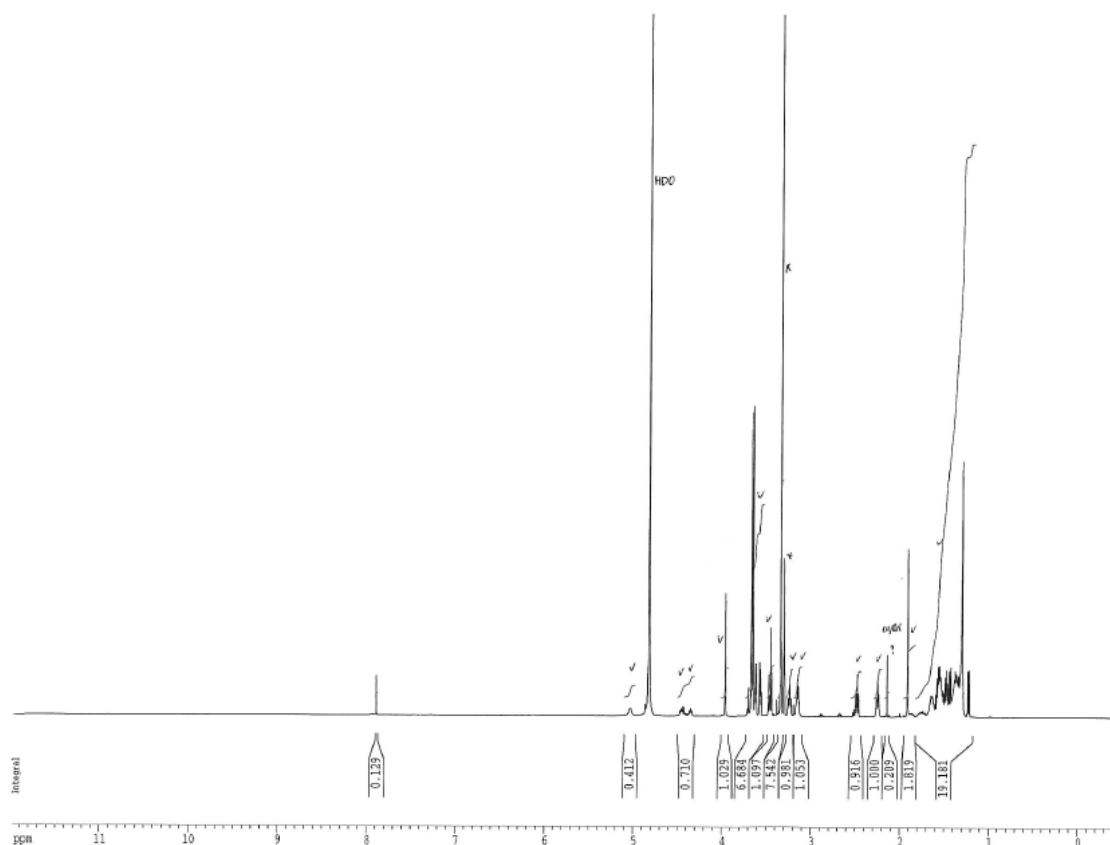

```

Current Data Parameters
NAME      ca-lac-rel-4
EXPNO     10
PROCNO    1

F2 - Acquisition Parameters
Data_     20010619
Time      17.25
INSTRUM   drx500
PROBHD    5 mm Dual 13
PULPROG   zg30
TD         65536
SOLVENT   MeOH
NS         56
DS         0
SWH        6510.417 Hz
FIDRES     0.099341 Hz
AQ         5.0332146 sec
RG         128
DM         76.800 usec
DE         6.00 usec
TE         300.0 K
D1         2.00000000 sec

===== CHANNEL f1 =====
NUC1       1H
P1         11.70 usec
PL1        0.00 dB
SFO1       500.0527503 MHz

F2 - Processing parameters
SI         32768
SF         500.0500193 MHz
WDM        EM
SSB         0
LB         0.10 Hz
GB         0
PC         1.00

1D NMR plot parameters
CX         30.00 cm
F1P        12.000 ppm
F1         6000.60 Hz
F2P        -0.400 ppm
F2         -200.02 Hz
PPHMM      0.41333 ppm/cm
HZCM       206.68733 Hz/cm
    
```

**$^{13}\text{C}$ -NMR (125 MHz)**  
**KdAdLac in MeOD**

Standard  $^{13}\text{C}$  DRX500  
Lac-RE1-4  
D. Zhou - CA

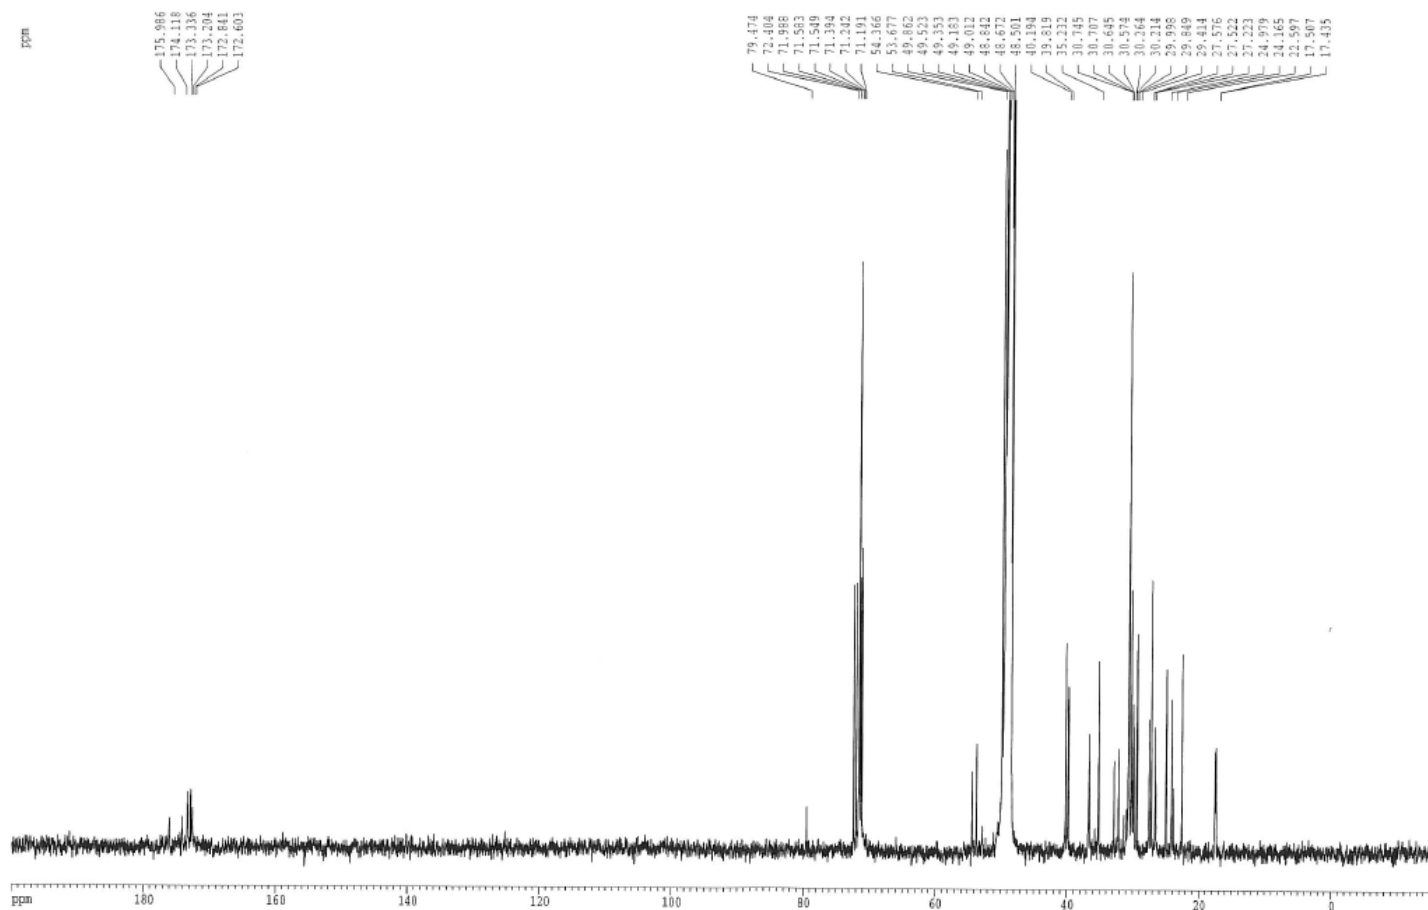

**$^{13}\text{C}$ -NMR APT  
KdAdLac in MeOD**

Standard APT DRX500  
Lac-RE1-4  
D. Zhou - CA

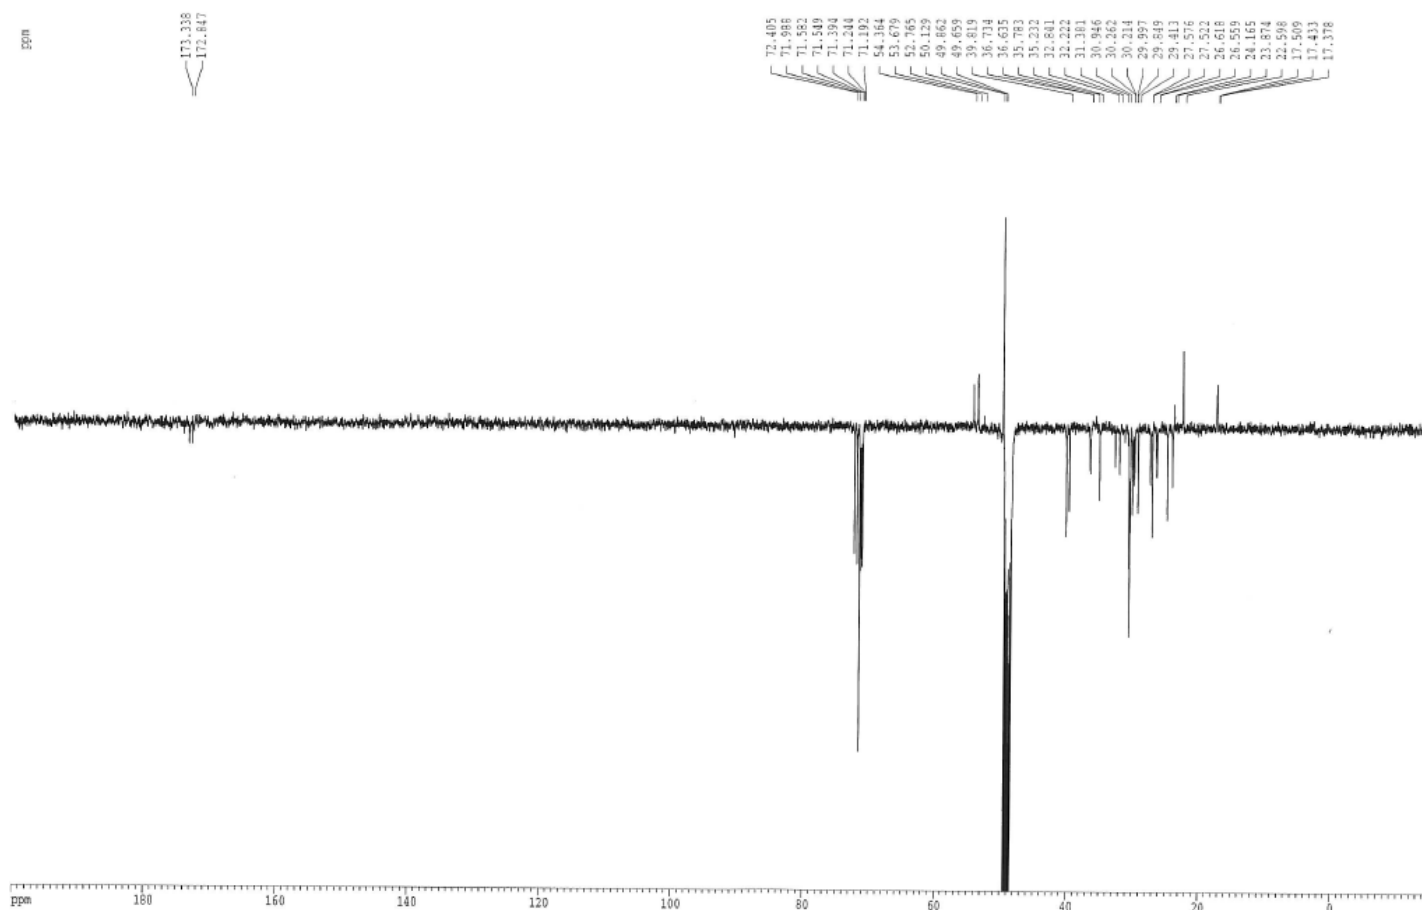

## High resolution mass spectroscopy KdALA

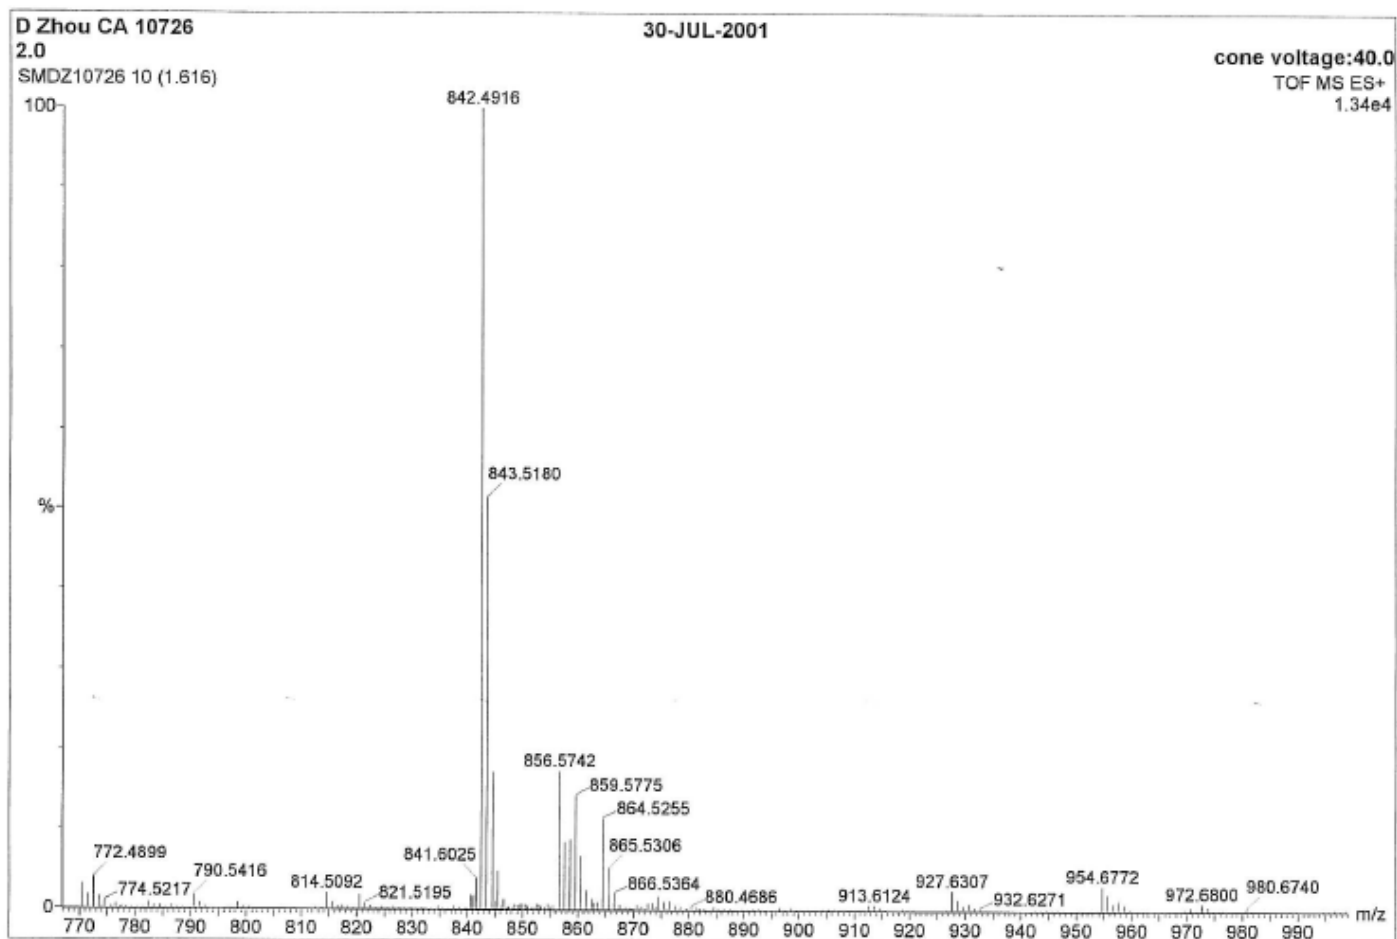

# 1H-NMR (500 MHz) KdALA in MeOD

Standard DPX400  
L-ALA-HY3-6  
proton126.std MeOH /disk2 service 14

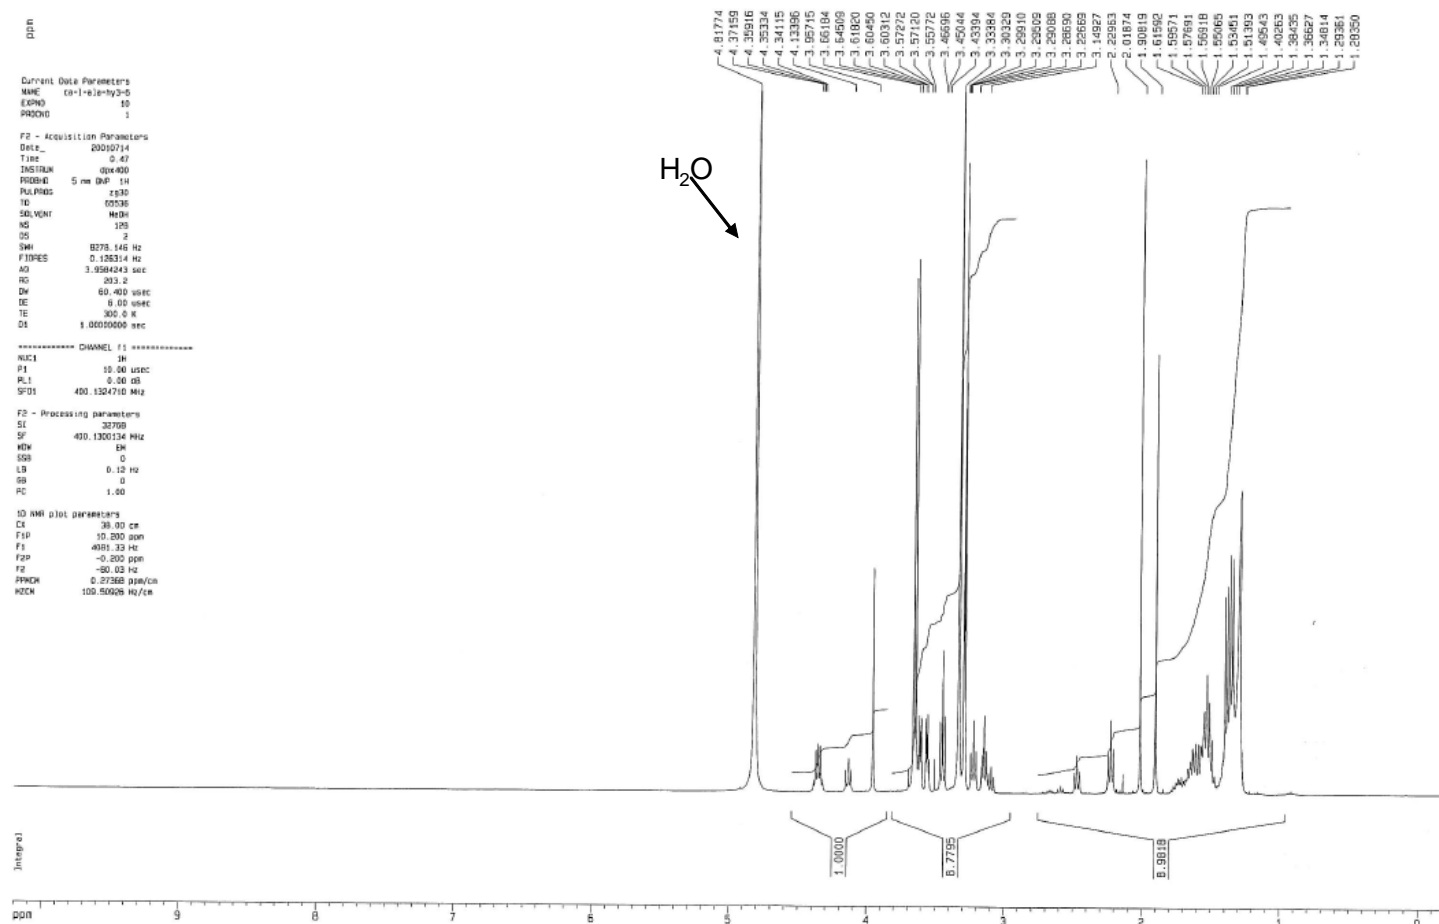

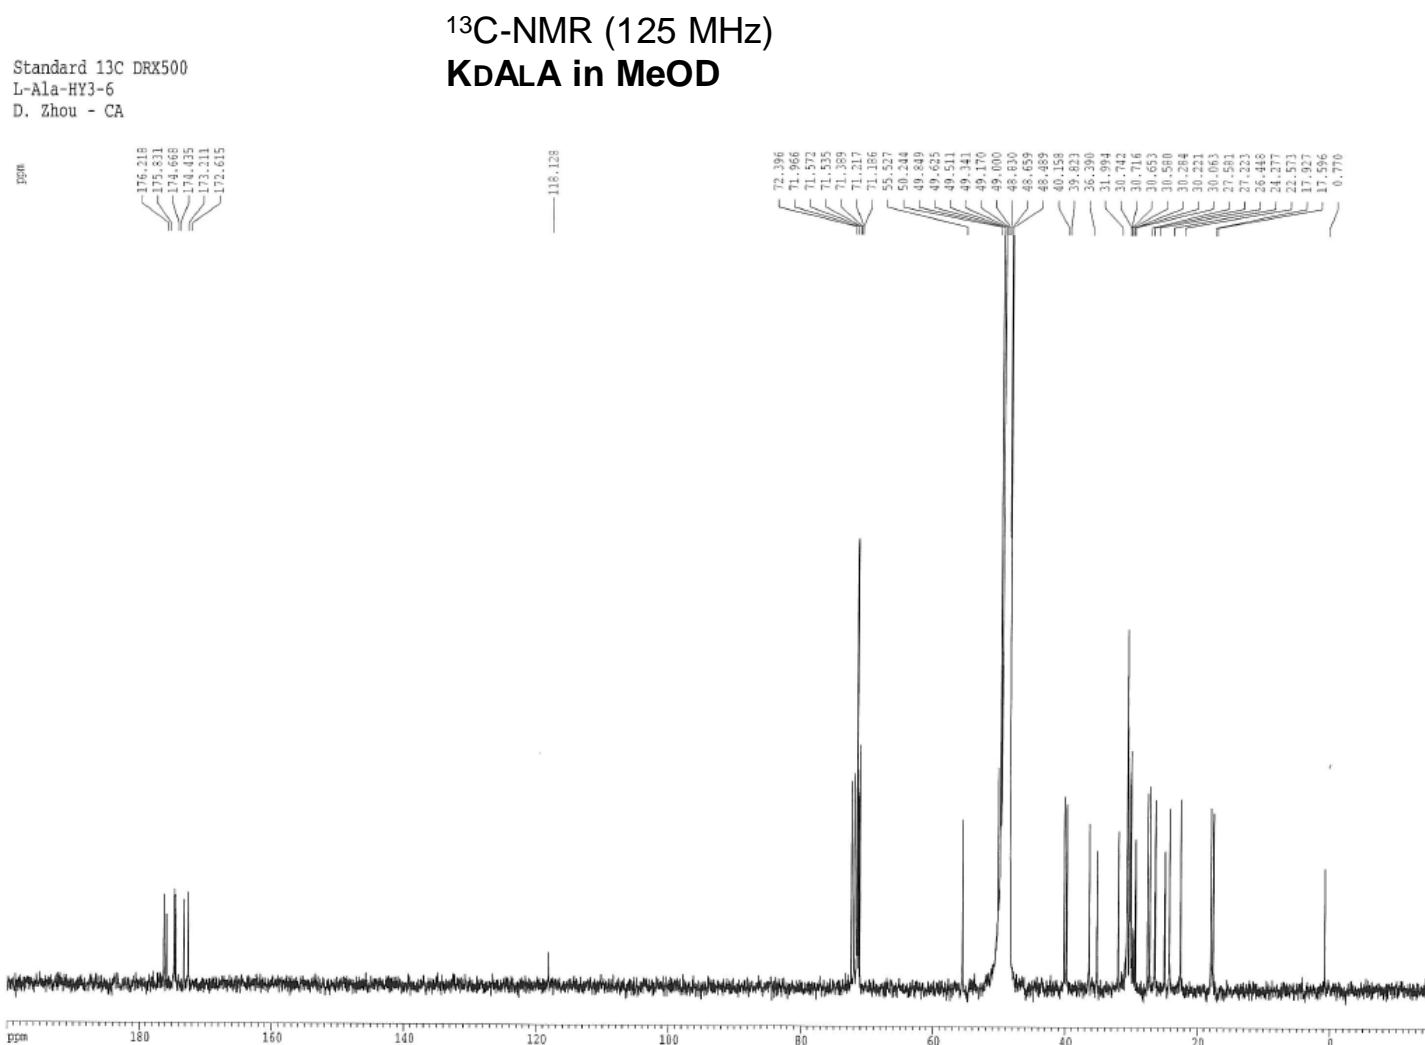

Standard APT DRX500  
L-Ala-HY3-6  
D. Zhou - CA

**$^{13}\text{C}$ -NMR APT  
KdALA in MeOD**

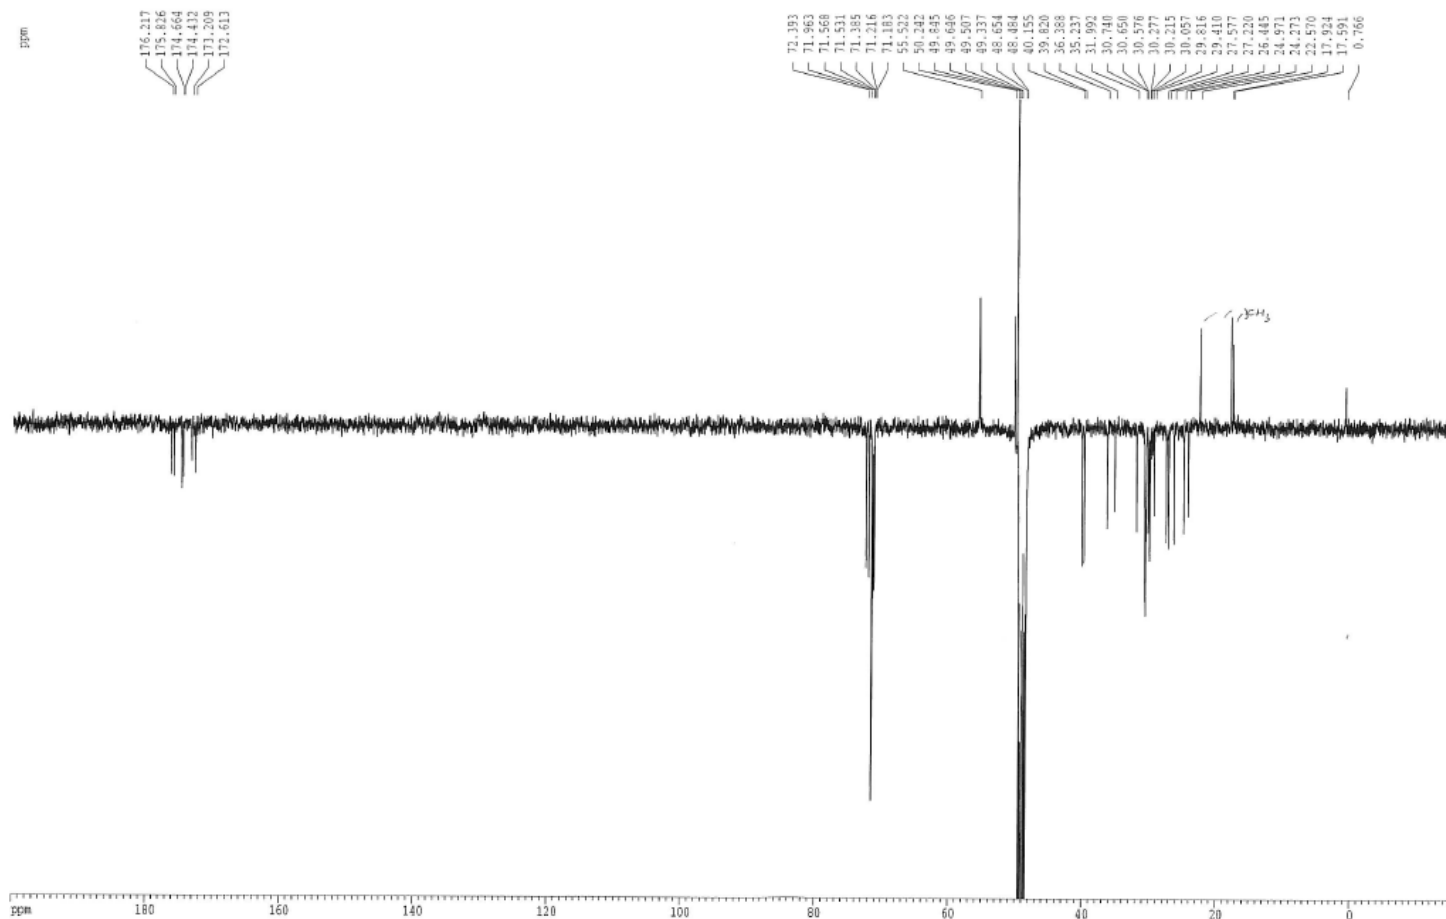

Supplement: b919347b.pdf [file b919347b.pdf]
